# Supplementary material for: Targeting vertebrate intron-encoded box C/D 2′-O-methylation guide RNAs into the Cajal body
Source: PubMed Central journal article supplement (PMC4041459; doi:10.1093/nar/gku287), 2014-04-20
Supplement: supp_gku287_nar-00609-a-2014-File009.pdf [file supp_gku287_nar-00609-a-2014-File009.pdf]

## **SUPPLEMENTARY INFORMATION**

### **Targeting mammalian intron-encoded box C/D 2'-O-methylation guide RNAs into the Cajal body**

Aline Marnef, Patrica Richard, Natalia Pinzón and Tamás Kiss

#### **Results**

To identify evolutionarily conserved and therefore, functionally important sequences in vertebrate box C/D scaRNAs, the coding genes of the intron-encoded mgU2-47, U90, mgU2-19/30, and the independently transcribed mgU2-25/61 and mgU12-22/U4-8 scaRNAs were identified in mammalian, bird, lizard, turtle, frog and/or fish genomes by BLAT search (UCSC Genome Browser). The predicted RNA sequences were aligned to maximum homology by using the ClustalW2 algorithm developed for multiple sequence alignment (EMBL-EBI). In addition to the conserved C/D and C'/D' boxes and the RNA-specific target recognition sequences, we detected long GU- and AU-rich internal repeat sequences in the intronic mgU2-47, U90 and mgU2-19/30 scaRNAs (Figures S1, S2 and S3). The 5'-terminal regions of the independently transcribed mgU2-25/61 scaRNAs are also enriched in GU dinucleotide repeat sequences (Figure S4). In contrast, compilation and comparison of the Pol II-transcribed mgU12-22-U4-8 box C/D scaRNA sequences failed to identify GU-rich internal sequences (Figure S5).

|            | box C                                                                                                                                    | tSL             |     |
|------------|------------------------------------------------------------------------------------------------------------------------------------------|-----------------|-----|
| cat        | AGCAAAGT <b>GATGAG</b> -CGTTGCTGGCTGGAG-CCCCAAAG----AGGCACACG- <b>TGTGTGTGTGTGTGTATGTATGTATATATATATCTGTGCCCTTGTCTGTGCATGCACACGTATGT</b>  |                 | 113 |
| armadillo  | AGCAAAGT <b>GATGAG</b> -CTTTACTGGCTGGAG-CCCCAAAG----AGGCACACG- <b>TGTGTGTGTGTGTGTGTCTGTGTTTGTATATATGTATGTCTTGTGTAT</b> -----GCACAGGTGTTT |                 | 108 |
| dog        | AGCAAAGT <b>GATGAG</b> -CATTATTGGCTAGAG-CCCCAAAG----AGGCACATG- <b>TGTGTATGTGTGTGTATGTAATGTGTCTGTATCCTTGTCTGTGCATG</b> -----CACATGTATGT   |                 | 105 |
| human      | AGCAAAGT <b>GATGAG</b> -TAATACTGGCTGGAG-CCCCAAAG----AGGCACGTG- <b>TGTGTGTTTGTGTGTGTGTATATGCTTGTTCAGTGCATGCACGTGTATGT</b> -----           |                 | 97  |
| rabbit     | AGCAAAT <b>GATGAG</b> -CCACACTGGCTGGAT-CCCCAAAG----AGGCACGTG- <b>TGTGTGTGTGTGTGTGTGTGTGTCTGTCCGTGCCCTCCTTGTCTGTGCGCTCCC-CGTGTGT</b>      |                 | 112 |
| mouse      | AGCA <b>ATGATGAA</b> -CAATACTG-CTGGAG-CCACAGAG----AGGCACAAG- <b>TGTGTGTGCCAGATTGCCTGTGTGTATGTGTGTCTTGTCTGTGCATG</b> -----CACACGTGAGT     |                 | 104 |
| opossum    | AGCAAAT <b>GATGGA</b> -TATTATTGGTTGGAG-CCCTAAAG----AGGCA-ATA- <b>TGAATGTATATGAATGACTGTATGTG</b> -----CGCGCACT <b>TGTGC</b>               |                 | 84  |
| chicken    | AGCAAAGT <b>GATGAA</b> -TAATATTTCTTGAG-CCAAAAG----AGAGAGAGT- <b>TGTGTGTGTGTGGTTGTATGA</b> -----                                          |                 | 58  |
| zebrafinch | AGCAAAT <b>GATGAG</b> -AAACACTTGCATGAG-CCGAAGTG----AGTGAGTTG- <b>TGTGTGTGTGTGCAGTGGTGTGGTTGTTTGA</b> -----                               |                 | 67  |
| Xenopus    | GGCAAAT <b>GATGAG</b> -ATCATCAGACTTGACTCCCCACAG---- <b>TGTGACTCG-TG-GCACTTGTGTGTGTTTGTGTGCATGTTTGTGCATGT</b> -----                       |                 | 71  |
| lamprey    | AGCAGG <b>ATGATGA</b> AAAACTTTTTCTTGAG-CCCCAAAATAAAATTCACACGTTGTGTATTTGTTT- <b>TGTAATTGTGCGTA</b> -----ACACGTATTC                        |                 | 89  |
|            |                                                                                                                                          |                 |     |
|            |                                                                                                                                          | antisense box D |     |
| cat        | CTGGGAGTTT <b>GAGTGTATGTGTGACTGGTGGTAGGGAACAAGTTAC</b> ---GTGCCCTTC-TGTT---GGACCATGACAGT <b>CAAAC<b>TGATAAGATCTG</b>ATTGCT</b>           |                 | 207 |
| armadillo  | CTGGGAGTACAAATG--TGTGTGACTGATTGTAGGAAATACTTAAT--GTGCCCTTC-TGTT---GGACTGTGACAGT <b>CAAAC<b>TGATAAGATCTG</b>ATTGCT</b>                     |                 | 201 |
| dog        | CTGGGAGTACGAATG--TGTCTGACTGATTATAGGAACTAGTCTAT--GTGCCCTTC-TGTT---GGACGATGACAGT <b>CAAAC<b>TGATAAGATCTG</b>ATTGCT</b>                     |                 | 198 |
| human      | CTGGGAGTACAAATG--GGTGCGACTGGTTGTAGGAACTAGCTAT--GTGCCCTTC-TATT---AGGCCATGACAGT <b>CAAAC<b>TGATAAGATCTG</b>ATTGCT</b>                      |                 | 189 |
| rabbit     | CTGG--CTATGCGTG---TGTGTCTGGTTATAGGAACTAGCTGT---GTGCCCTTC-TGTT---GGGCCATGACAGT <b>CAAAC<b>TGATAAGATCTG</b>ATTGCT</b>                      |                 | 200 |
| mouse      | CTGGGAGGATGGATG--TGTGTGACTGGTGGTAGGGACCTAGCCCT---GTGCCATC-TTCT---GGGCTGTGACAGT <b>CAAAC<b>TGATAAGATCTG</b>ATTGCT</b>                     |                 | 196 |
| opossum    | CTGGATGTATGACTG-GAGTATGAATGAGGATAAGGACCTAGTTAT---TTGCCCTTC-TTTTATAGGGCCATGATATTC <b>CAAAC<b>TGATAAGATCTG</b>ATTGCT</b>                   |                 | 180 |
| chicken    | -----CAG-----GGTGTTTGTGAG-----AATTGT---GTGCCCTTA-TAAT--TTGGTGGTGCAGCT <b>CAAAC<b>TGATAAGATCTG</b>ATTGCT</b>                              |                 | 140 |
| zebrafinch | -----GAG-----AACTGT-----GTGCTTA-TAAT--TGGGCAGTGCATAGCT <b>CAAAC<b>TGATAAGATCTG</b>ATTGCT</b>                                             |                 | 137 |
| Xenopus    | -----GGGTGACTGGTTGAGTG----TGAGTGAG--CACCTTC-ACATG--GGTTCCTGAGAGCT <b>CAAAC<b>TGATAAGATCTG</b>ATTGCT</b>                                  |                 | 159 |
| lamprey    | ACGTTTGTTCATGTA--CACGTGTTGTTTATATGGTTCTGTTTTAATGTTGCACACGTGTGAACGGGCAGTGGGAAGGA <b>CAAAC<b>TGATAAGATCTG</b>ACTGCT</b>                    |                 | 187 |

**Figure S1.** Sequence alignment of vertebrate mgU2-47 RNAs. The conserved box C and D motifs and the antisense sequences are indicated in red and blue respectively. The RU-rich internal sequences are highlighted in yellow. The experimentally defined CB-localization stem-loop (tSL) of human mgU2-47 is shaded in blue.

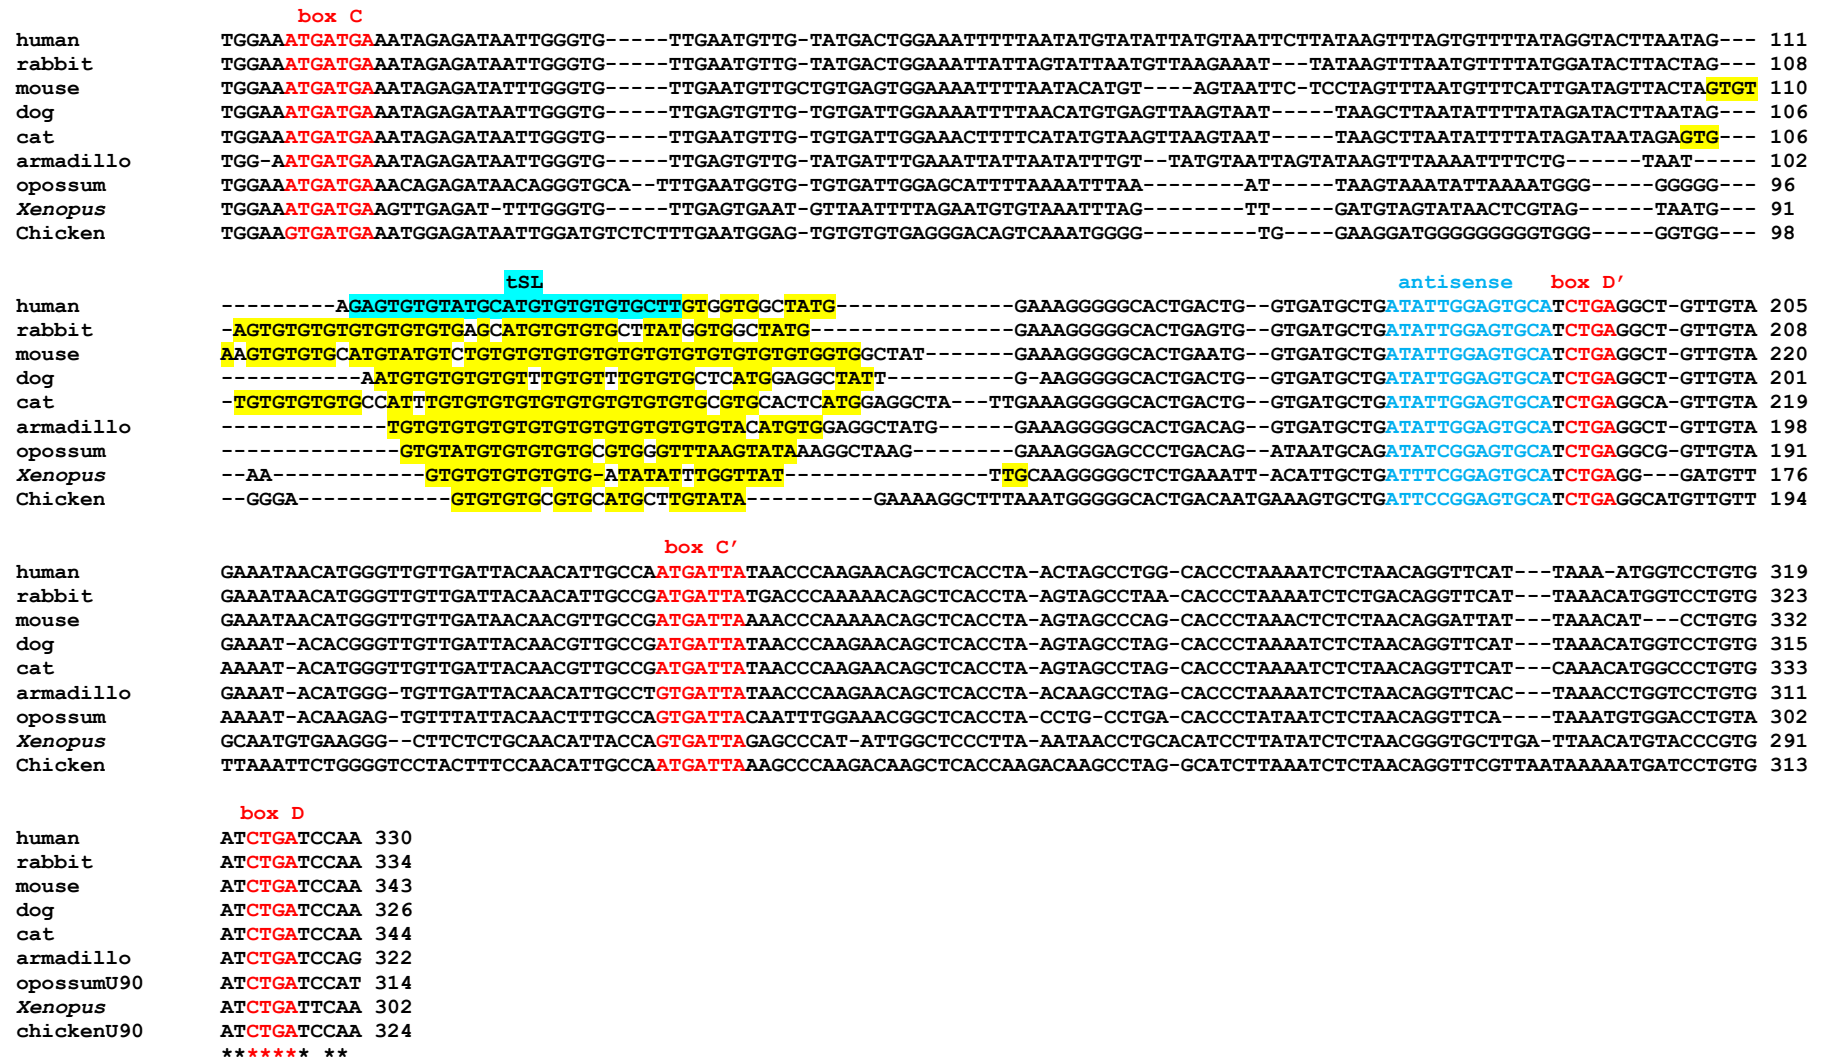

**Figure S2.** Sequence alignment of vertebrate U90 RNAs. The conserved 5'-terminal C and 3'-terminal D boxes and the putative internal box C' and D' motifs are indicated in red. The predicted antisense sequences are in blue. The RU-rich internal sequences are highlighted in yellow. The experimentally defined CB-localization stem-loop (tSL) of human U90 is shaded in blue.



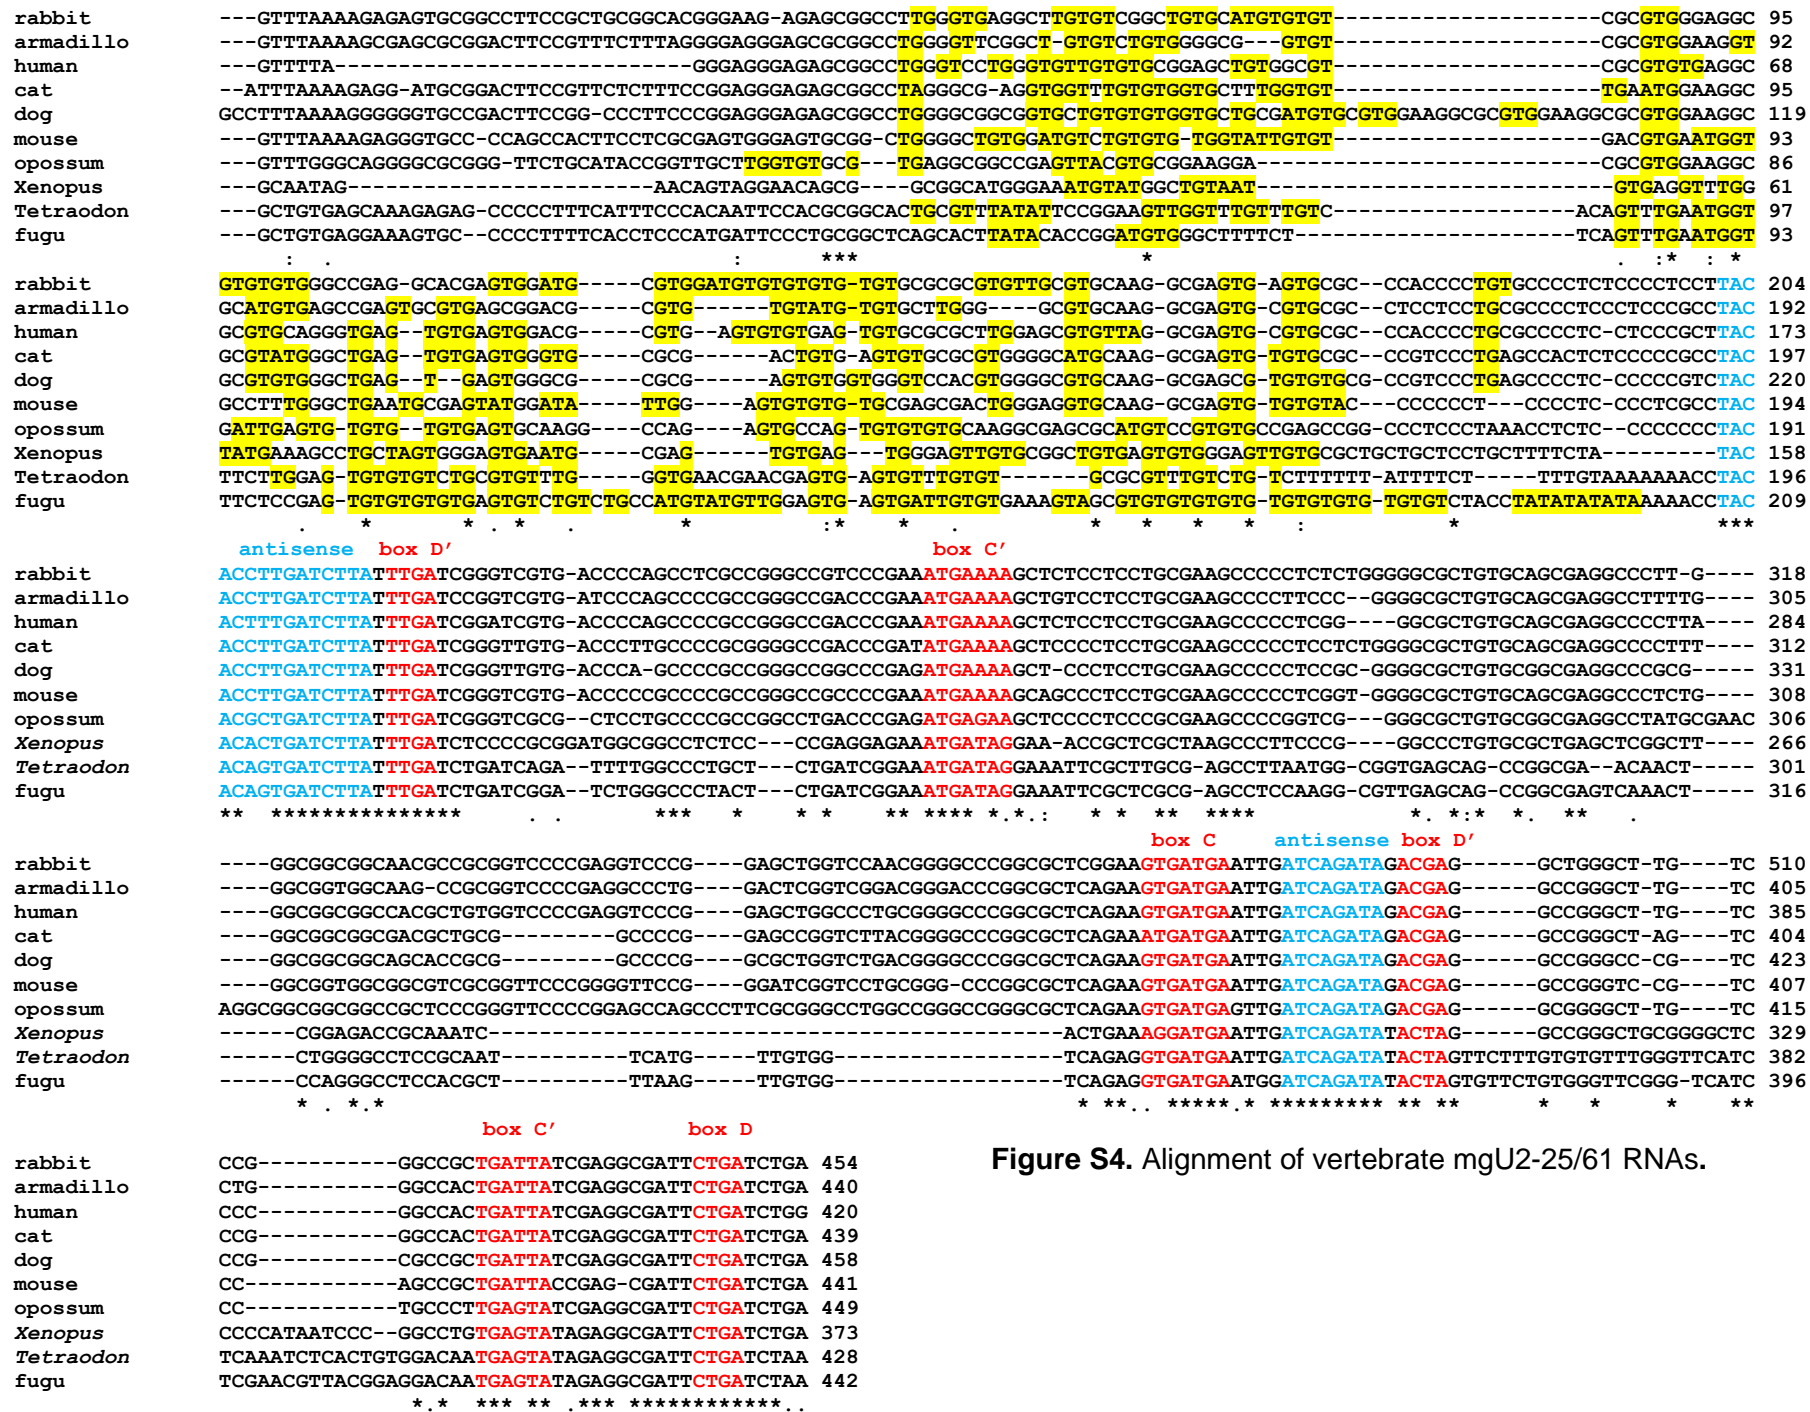

Figure S4. Alignment of vertebrate mgU2-25/61 RNAs.

```

human      ---AGAGGCTTGGGCCGCCG---AGCTGG-----ACCCGGACCCG-----TTTTGGG-TACTGTACTGGG--GCAGGGCA---GAGAGG-----TGGGCG----- 74
cat        ---CTGGGTTTGAGAGAGAC---CCTAGG-----ACTGGAAGCTA-----GTTGGCG-GGCCCGAGTGGGGTGGTGGGGT---GGGAGG-----TTGGCG----- 76
armadillo  ---AGATCAGTGGGCAGAG---CCTAGA-----TCTCTGCGCCG-----GACGAAGGAGCGTGGTGGCGGAGGCATGGT--GGGTGG-----GAGCGAAGAGG 85
rabbit     ---ATAGTATTTCTCAATGGTGACACTTGG--GAATTTGCAGAAGCTG-----CTTTGGAGTTCAGGTGGCG--GCCTGGGC-GCGGGGCGAG-----GCCGGCGGG 90
dog        ---AGAGGGCGGGCGCCGGGATTTGGCTGGGCGCCCGTGCGGGGCGGGGGCGGGCGGGCTGCGCGGAGGGGGCGAGGCTTAGCTGCGCGGGGAGAGGGGCGGGAGGA--- 114
mouse      ---GGTGGGATTGGCTGCCCTTGCCTGCGCAGCCTTCTGGCGGCGG-----CCTGTGCTAGTTCGG--AGCGG-GGCCGTGGC---GGGTAG-----CTGGGCG--- 88
opossum    ---CGGGCTGGGACAGTG--ATAACT--TCGGGAGCG-----GTTGCTTTGTCTCAGAT--CGCTCGGC-----GGTCT-----TTGGGGG--- 74
lizard     --ATGGTCCCCAAACGAAAGCATTCTTTGG-----GTGGTGGGCGG--TAGTGTTTGGGAAGGACATTGCGAGGGGT--TGGGCTG-----CATATT----- 81
turtle     ---TAAAGCTTTATATCTGTTAAACAC---AAATGTCAA-----CATCA--CATATCAGAATATGCAAAGTAA---ATAT----- 66
Coelacanth GTCTAAGGGTTTTTTTATTATTATTTTGG-----TAACTTTTCAG-----TTTTAGAAGTGTTTTACAATAACAATA---ATTTA----- 75

```

```

human      ---CGAGTGGGGTGCCTGTG---ATTGTAGTAGGCTAGGG-CGCTTTCGGGTC--CCCATTGCAGC-----CCCCGGATGAGCCCGCAGTATTTTCCTTATATGATCAGGTCCCA 175
cat        ---TCCGAGGGAGTGTAGTG---AGTGTCTTAGGGCAGGG-ATGCCCGGAGTC--CCGAAATAGC-----CC-CGATGAGCTCGCAGTATTTTCCTTATATGATCAGGCCCG 176
armadillo  TTGGCTTCGGGGGTGTAGCG---AACGTAGTAGGTTAGGGGCGCCGGGGATC--CCTGATCCAGC-----CCCTGGATGAGCCCTCAAATATTTTCCTTATATGATCAGGCCCTTT 190
rabbit     ---CGGTGGGGTGCCTGTG---AGGGTTG-TAGGGTAGGG-TGCGCCCGGATC--CCAAGTGCAGC-----CCCCGCATGAGCCCGCAGTGTTTTCCTTATATGATCAGGCCCG 190
dog        ---CCGGTGGGGGCGGTGGTC-GGGGTTGGAAGCGCGGGA-AGCCCCGAGTC--CCCAGTGTAGC-----CCCCTCGTGAGCTCGCGGTATTTTCCTTATATGATCAGGCTCCG 219
mouse      ---TCTAGAGAAGGGAAGGG---GAACGTGGTAGAGCAGGG-AGCGCTTGGGTC--CCCGAGGCAG-----CCCCGAGTGAAGCCGATGATTTTCCTTATATGATCAGGCCCT 189
opossum    ---AAGGAGGATTCTTTG---CAGTTTAGGAAGGGGAGAAGCGCCGAGTCGCCCAACGCAGC-----CCCCAAGTGA-CCACTATATTTTCCTTATATGATCAGGCCCT 176
lizard     ---CATGGAGCTCGCTTAACCAAAATGTCAATGGAAAAGATTGACTTGGTGGCTCCTCAGCATAGGAACTGTAAGCTATTTGTGAAGCCCGAGGCTGTTTGTGTGAACAGACACC 197
turtle     ---CCTTAAATCAAATTGAG---TTCCAAGCAGCATTTTTACTTTGTCTATCTGTAATTTAGAT-----GATCATAGATGGAATATTTTAAAT--TGTTTTGTGCT-CATACA 168
Coelacanth ---CCTGAAGTAAGTTTGTG---TTGTGTTGTAACCAATTG-CTTAAGGCTGGGAACGATATTCAGT-----GAAAAAATACTTTGTAATATTCGTAATAGGCT-AAAATT 178

```

```

human      TTGCGGGCGGGCCGCTTGCC-----CGGAGCCTGAGAGGATTAATG-----AAAACGTGGCGAGCGAAATGGGGCCAGGGACCTGGAG----CAGGGCGGTGAGGAGAG 271
cat        TTGGTGGCGACGCCGCTAGCC-----CGGAGCCTGAAAGGATTAATG-----AAAATGTGTCCGCGCAAGTGGGG-CTGGGGACCGGGAG----CCGGGAGATTAGG--- 267
armadillo  TTGTAGGCGGGCCGCTTGCC-----CGGAGCCTGAGAGGATTAATG-----AAAAT-TGCCGGGTGATGTGGGGCCAGGGGACCGGGCG----CGGGGAGTTAGGGCA 285
rabbit     TTACGGGCGGGGCGCTTGTCT-----CAGGGCCTGAGAGGATTAATG-----AAAACGAGGCAGCGCAAGTGGGG-CTCGGGGCGCG-----GGCAGGTTAGGGCGA 281
dog        CT-----CGGCGCGCTGGGC-----CGGAGCCCGAGAGGATTAATG-----AAAACGTGTGGGTGAGGTTGGGG-CTGGGGACCGG-----GGCG-----GGGAGA 299
mouse      CG-TAACCGGCGCTGCTGGTT-----TGAGCCTGAGAGGATTAATG-----AAAACGTGGCAGGTGATG-GGGT-CAGGGGACCTGGAG----CGGGGAAGCAGAGGGGA 282
opossum    GGGCAGGGGACGGTTTGGTACT-----GGGAGCCCGAAGTGAATTAATG-----AAAATGATGCAGGGATGGGAGGCTTGGGGCCCGGACTGGCGCTGGGCGCAAGGCAGGG 280
lizard     GTGCCACATACACACATATACAGGTTTTTACTAGATCTGTATGTCTAGTCTCCTAGACTAGACTAGACTAGATATTTAGATATAGATTGCATTCAGCATGGGTAACCTAAGGGTGT 317
turtle     GTGAAATGACATTCACCAAC-----ATTTACTGATAAAAATCT-----AATCCTAGTT--CTAATGTGACTGGGAGAATGACTGGT-----GGGAACATCTTGCAAT- 258
Coelacanth AT-TTATTTATTTGGGTTTTT-----AGGGACTGTGTAAGATAA-----CTTAATCGGTGGTTAATTTAGATAGAAAGACATAGAT-----AAGTTAAAGTGACATT 271

```

```

human      TAGGCAG-----CGGGTGGAGGCTGG-----ACGGGAGGGAGGTTCTAG-----GGAGGCTCTGCCGCGGGCACTGTGAGTCTTGCCGATGATGACGAGACCACT 361
cat        --GGTAG-----CGGGT-AGGCTGG-----AGATGAGGGAGCTTTAG-----GAAGGCTCTGCCGCTGTAACCTGTGAGCCCTGGTTCGATGATGACGTTGACCACT 354
armadillo  AGGGTAGT-----CGGGT-AGGCCGG-----AGAGGCGGAAGGTTTAG-----GGAA-CCTCTGCTGCTG-----TGAGCCCTGGTTCGATGATGACGTTGACCACT 368
rabbit     GAGGGCGG-----GTGGG-AGCCCT-----CTGCCACTGTGACCG-----TGAGCCCTGGCCGATGACGACCCAGCACT 346
dog        CCGGGCGG-----TCGGG-AGGCC-----CTGCC-CTGCAGCG-----CGAGCCCGGGTTCGATGATGACGTTGACCACT 363
mouse      GAGGGACTGA-----GTGGG-AGCCAGGCTTCGGGGAGGGGATAGGTTTAGGG-----TACCACGCGCTCCAGCTG-----CAAGCCCTG-CCAATGATGACATGACCACT 379
opossum    CAGGGAAGGGGCGAGCTTCTGGGCTGTCCCCGTTGGGGAGGGTGGGCGCTGCTGGGGTGGGGGAGGAAGGGGAGCCATAGCGCGCTTTTGGAAACCCTGGTTCGATGATGACGTTGACCACT 400
lizard     TTGGTTGTGGCTACAATTTTAGGATGTAATTTG--TCATACGTTCAAATFACTCCAGTTAG-----AGAAGCATTTCCCTTG--TTGCAAGGACTGGTCTGTGATGAATAGCCCACT 425
turtle     GAAGATGG-----CAGGAAAG-----AAAAAGTGTGGAGCTC---ACTAAGCCCTGGTCTGTGATGATGATTAGCCCACT 322
Coelacanth AAAAATGG-----TAGGAATGATTTT-----TTTTT-----AAATGTGTAGTAATT---TTAAACCAATGGTCTATGATGACTAGCTCACT 346

```

```

human      CCGCAATCTGAGTTCTG---GGAACC--AGGTGATGGAGTATGTTCTGAGAACA--GACTGAGGCCG 421
cat        CCGCAATCTGAGTTCTA---GGAACC--AGGTGATGGAGTGTGTGCTGAGAGCT--GACTGAGACCG 414
armadillo  GCTCAATCTGAGTTCTT---AGAACC--AGGTGATGGAGTGTG-GCTGAGAATG--GACTGAGACCG 427
rabbit     GCACAACCTGAGTCTCTG---CACACC--AGGCTTGGAGTGTGTTCTGAGAACA--GACCAAGGCCG 406
dog        CCGCAATCTGAGTTCTAG---GAACCC--AGGTGATGGAGTGGATGCTGAGAGCG--GACTGAGACCT 424
mouse      CCGCAATCTGAGTTCTG---GGAACC--AGGTGATGGAGTGTG-TGCTGAGAAC---ACTGAGGCCA 435
opossum    CCGCAATCTGAGTTCTG---AGAACC--AGGTGATGGAAATGTGTGCTGAGAGCG--GACTGAGACCA 460
lizard     CCGCAATCTGAGTTCTGT---AGAACC--CAATGATGGATTTTGTGCTTTCGAAGGCATCTGAGACCA 488
turtle     CCGCAATCTGAGTTCTG---AGAACC--TACATGATGAGATTTGTGCTGAGAAGGCAGCTGAGACCA 385
Coelacanth CCGCAATCTGAGTTCTGCGGAGACGTATCATGAGAGAGCAGTGTGCTGACGAAG--AACTGAGACCA 411

```

Figure S5. Alignment of vertebrate mgU12-22/U4-8 RNAs.

```

sense box D'      box C'      box D
** *** ***** *      * :      * : ..      * .** ** : * ****

```
